# Supplementary material
Source: MDPI journal article supplement (https://www.mdpi.com/2079-6412/12/12/1839)
Supplement: s1 [file s1]

# Supplementary Materials: Electrodeposition of Copper Oxides as Cost-Effective Heterojunction Photoelectrode Materials for Solar Water Splitting

Tai-Hsin Yin <sup>1,†</sup>, Bu-Jine Liu <sup>1,†</sup>, Yu-Wei Lin <sup>1</sup>, Yi-Syuan Li <sup>1</sup>, Chih-Wei Lai <sup>1</sup>, Yu-Pin Lan <sup>1</sup>, Changsik Choi <sup>2,\*</sup>, Han-Chen Chang <sup>3,\*</sup> and YongMan Choi <sup>1,\*</sup>

<sup>1</sup> College of Photonics, National Yang Ming Chiao Tung University, Tainan 71150, Taiwan

<sup>2</sup> Clean Energy Conversion Research Center, Institute for Advanced Engineering, Yongin 17180, Republic of Korea

<sup>3</sup> Green Energy and Environment Research Laboratories, Industrial Technology Research Institute, Tainan 71150, Taiwan

\* Correspondence: cschoi@iae.re.kr (C.C.); yessey@itri.org.tw (H.-C.C.); ymchoi@nycu.edu.tw (Y.C.)

† These authors contributed equally to this work.

**Table S1.** Compilation of copper oxide-based photocathodes used for PEC water splitting.

| Photocathode                                                  | Efficiency (%) | Max. Current Density (mA/cm <sup>2</sup> ) | Condition                             | Publication Year, Reference |
|---------------------------------------------------------------|----------------|--------------------------------------------|---------------------------------------|-----------------------------|
| NiO/CuO/MoS <sub>2</sub> /ITO                                 | 0.10           | −2.14 (−0.55 V vs. Ag/AgCl)                | 1.0 M KOH                             | 2020, [26]                  |
| Cu <sub>2</sub> O/ZnO/NiO <sub>x</sub> /ITO                   | 0.11           | 0.84 (0 V vs. RHE)                         | 0.1M NaPi                             | 2020, [27]                  |
| Cu <sub>2</sub> O/FTO                                         | 0.12           | −0.21 (−0.21 V vs. RHE)                    | 0.5 M Na <sub>2</sub> SO <sub>4</sub> | 2016, [28]                  |
| g-C <sub>3</sub> N <sub>4</sub> /CuO/FTO                      | 0.12           | −0.85 (0 V vs. RHE)                        | 0.1 M Na <sub>2</sub> SO <sub>4</sub> | 2021, [29]                  |
| Cu-CuBi <sub>2</sub> O <sub>4</sub> /TiO <sub>2</sub> /FTO    | 0.16           | 0.33 (0.5 V vs. RHE)                       | 0.1 M phosphate buffer solution       | 2020, [30]                  |
| Cu <sub>2</sub> O/CuO/ITO                                     | 0.28           | 2.80 (0 V vs. RHE)                         | 1.0 M Na <sub>2</sub> SO <sub>4</sub> | 2018, [31]                  |
| CuO/FTO                                                       | 0.43           | -                                          | 0.5 M Na <sub>2</sub> SO <sub>4</sub> | 2016, [28]                  |
| CuO/Cu <sub>2</sub> O/FTO                                     | 0.55           | 3.15 (0.40 V vs. RHE)                      | 0.5 M Na <sub>2</sub> SO <sub>4</sub> | 2016, [28]                  |
| BiVO <sub>4</sub> /Ag/Cu <sub>2</sub> O/FTO                   | 0.56           | 3.36 (1.23 V vs. RHE)                      | 0.2 M Na <sub>2</sub> SO <sub>4</sub> | 2022, [32]                  |
| NiO-doped CuO/FTO                                             | 1.00           | −1.9 (0.6 V vs. RHE)                       | 2 M KOH                               | 2022, [33]                  |
| Cu <sub>2</sub> O/ITO                                         | 1.10           | 2.00 (0.65 V vs. RHE)                      | 0.5 M Na <sub>2</sub> SO <sub>4</sub> | 2021, [34]                  |
| A-GO/Cu <sub>2</sub> O/ITO                                    | 1.42           | 2.74 (−1.1V vs Ag/AgCl)                    | 0.1 M NaHCO <sub>3</sub>              | 2022, [35]                  |
| CuO/ITO                                                       | 1.48           | 1.20 (−0.55 V vs. Ag/AgCl)                 | 1 M KOH                               | 2011, [36]                  |
| NiO <sub>x</sub> /Cu <sub>2</sub> O/AZO/MoO <sub>x</sub> /FTO | 1.75           | 6.10 (0 V vs. RHE)                         | 1.0 M Na <sub>2</sub> SO <sub>4</sub> | 2022, [37]                  |

**Table S2.** Compilation of heterostructured copper oxide-based photoelectrodes.

| Structure             | Photocurrent Density (mA/cm <sup>2</sup> ) | Electrolyte                                       | Publication Year, References |
|-----------------------|--------------------------------------------|---------------------------------------------------|------------------------------|
| Cu <sub>2</sub> O/CuO | 0.45 at 0 V <sub>RHE</sub>                 | 0.5M Na <sub>2</sub> SO <sub>4</sub> (pH = 6)     | 2017, [38]                   |
| Cu <sub>2</sub> O/CuO | 1.4 at 0 V <sub>RHE</sub>                  | 1 M Na <sub>2</sub> SO <sub>4</sub>               | 2017, [39]                   |
| Cu <sub>2</sub> O/CuO | 1.2 at 0 V <sub>RHE</sub>                  | 0.1 M Na <sub>2</sub> SO <sub>4</sub> (pH = 6.25) | 2022, [40]                   |
| Cu <sub>2</sub> O/CuO | 1.03 at 0 V <sub>RHE</sub>                 | 0.2 M Na <sub>2</sub> SO <sub>4</sub> (pH = 6.2)  | This work                    |

**Table S3.** EDS analysis results of Cu<sub>2</sub>O, CuO/Cu<sub>2</sub>O, and CuO thin films.

| Thin Film             | Cu    | O     | Ratio |
|-----------------------|-------|-------|-------|
| Cu <sub>2</sub> O     | 69.78 | 30.22 | 2.30  |
| CuO/Cu <sub>2</sub> O | 60.42 | 39.58 | 1.52  |
| CuO                   | 51.96 | 48.04 | 1.08  |

**Table S4.** Band gaps of Cu<sub>2</sub>O, CuO/Cu<sub>2</sub>O, and CuO thin films.

| Sample                | Band Gap (eV) |
|-----------------------|---------------|
| Cu <sub>2</sub> O     | 2.35          |
| CuO/Cu <sub>2</sub> O | 1.81          |
| CuO                   | 1.45          |

**Table S5.** EIS parameters obtained by fitting the Nyquist plots with the equivalent circuit.

| Sample                | R <sub>s</sub> (Ω) | R <sub>sc</sub> (Ω) | R <sub>ct</sub> (Ω) |
|-----------------------|--------------------|---------------------|---------------------|
| Cu <sub>2</sub> O     | 75.2               | 47.9                | 45613               |
| CuO/Cu <sub>2</sub> O | 30.7               | 1281.0              | 11446               |
| CuO                   | 31.9               | 862.2               | 27602               |

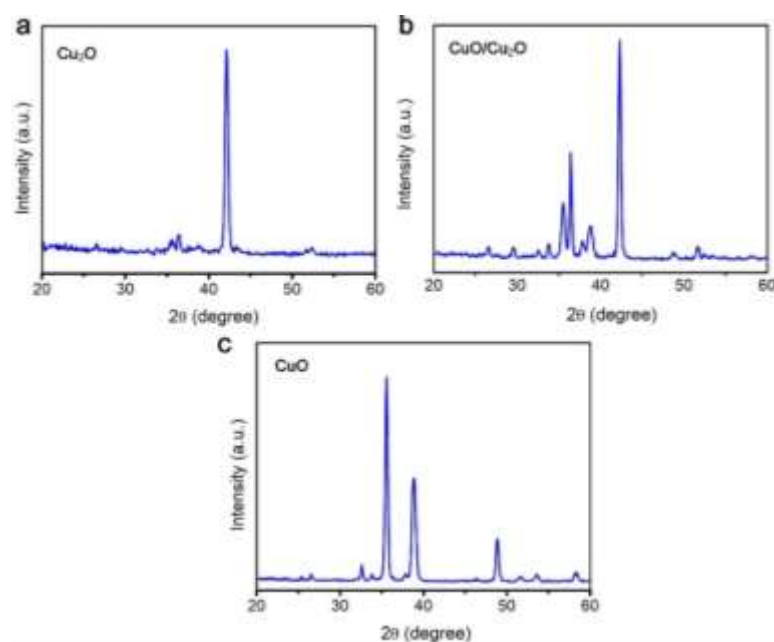

**Figure S1.** XRD patterns of (a) Cu<sub>2</sub>O, (b) CuO/Cu<sub>2</sub>O, and (c) CuO thin films.

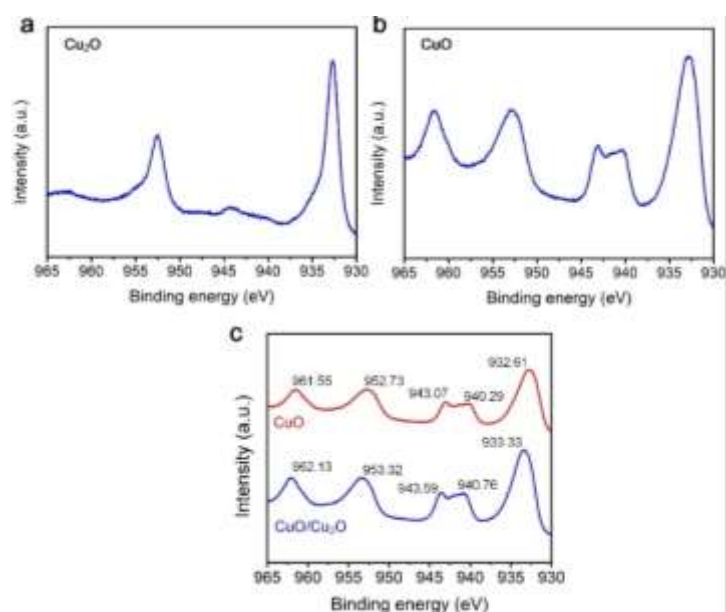

**Figure S2.** XPS spectra for Cu 2p of (a) Cu<sub>2</sub>O and (b) CuO thin films and (c) comparison of CuO and CuO/Cu<sub>2</sub>O thin films.
